# Supplementary material
Source: PubMed Central journal article supplement (PMC3675830)
Supplement: peds.2012-1303_peds.2012-1303SupplementaryData.pdf [file peds.2012-1303_peds.2012-1303SupplementaryData.pdf]

## Supplemental Information

**SUPPLEMENTAL TABLE 4** List of Genes Involved in Iron Metabolism Further Analyzed Using WES Data Obtained on Both Patients

| Gene            | Full gene name                                         | Protein                                |
|-----------------|--------------------------------------------------------|----------------------------------------|
| <i>ABCB7</i>    | ATP-binding cassette, sub-family B (MDR/TAP), member 7 | ABCB7                                  |
| <i>ALAS2</i>    | Delta-aminolevulinate synthase 2                       | ALAS2                                  |
| <i>BMP6</i>     | Bone morphogenetic protein 6                           | BMP6                                   |
| <i>CYBRD1</i>   | Cytochrome b reductase 1                               | CYBRD1                                 |
| <i>FTH1</i>     | Ferritin, heavy polypeptide 1                          | Ferritin H chain                       |
| <i>FTL</i>      | Ferritin, light polypeptide                            | Ferritin L chain                       |
| <i>FXN</i>      | Frataxin                                               | Frataxin                               |
| <i>GDF15</i>    | Growth differentiation factor 15                       | GDF15                                  |
| <i>GLRX5</i>    | Glutaredoxin 5                                         | Glutaredoxin 5                         |
| <i>GPI</i>      | Glucose-6-phosphate isomerase                          | Glucose-6-phosphate isomerase          |
| <i>HAMP</i>     | Hepcidin antimicrobial peptide                         | Hepcidin                               |
| <i>HFE</i>      | Hemochromatosis                                        | HFE                                    |
| <i>HFE2</i>     | Hemochromatosis type 2                                 | Hemojuvelin                            |
| <i>HMOX1</i>    | Heme oxygenase (decycling)1                            | Heme oxygenase-1                       |
| <i>HMOX2</i>    | Heme oxygenase (decycling)2                            | Heme oxygenase-2                       |
| <i>MON1A</i>    | MON1 homolog A                                         | Vacuolar fusion protein MON1 homolog A |
| <i>NEO1</i>     | Neogenin                                               | Neogenin                               |
| <i>SLC11A2</i>  | Solute carrier family 11, member 2                     | DMT1                                   |
| <i>SLC25A28</i> | Solute carrier family 25, member 28                    | SLC25A28                               |
| <i>SLC25A37</i> | Solute carrier family 25, member 37                    | Mitoferrin-1                           |
| <i>SLC39A1</i>  | Solute carrier family 39, member 1                     | ZIP1                                   |
| <i>SLC40A1</i>  | Solute carrier family 40, member 1                     | Ferroportin                            |
| <i>SMAD4</i>    | SMAD family member 4                                   | SMAD4                                  |
| <i>STEAP3</i>   | STEAP family member 3                                  | STEAP3                                 |
| <i>TF</i>       | Transferrin                                            | Transferrin                            |
| <i>TFR2</i>     | Transferrin receptor 2                                 | TfR2                                   |
| <i>TFR1</i>     | Transferrin receptor 1                                 | TfR1                                   |
| <i>TWGS1</i>    | Twisted gastrulation homolog 1                         | TWGS1                                  |

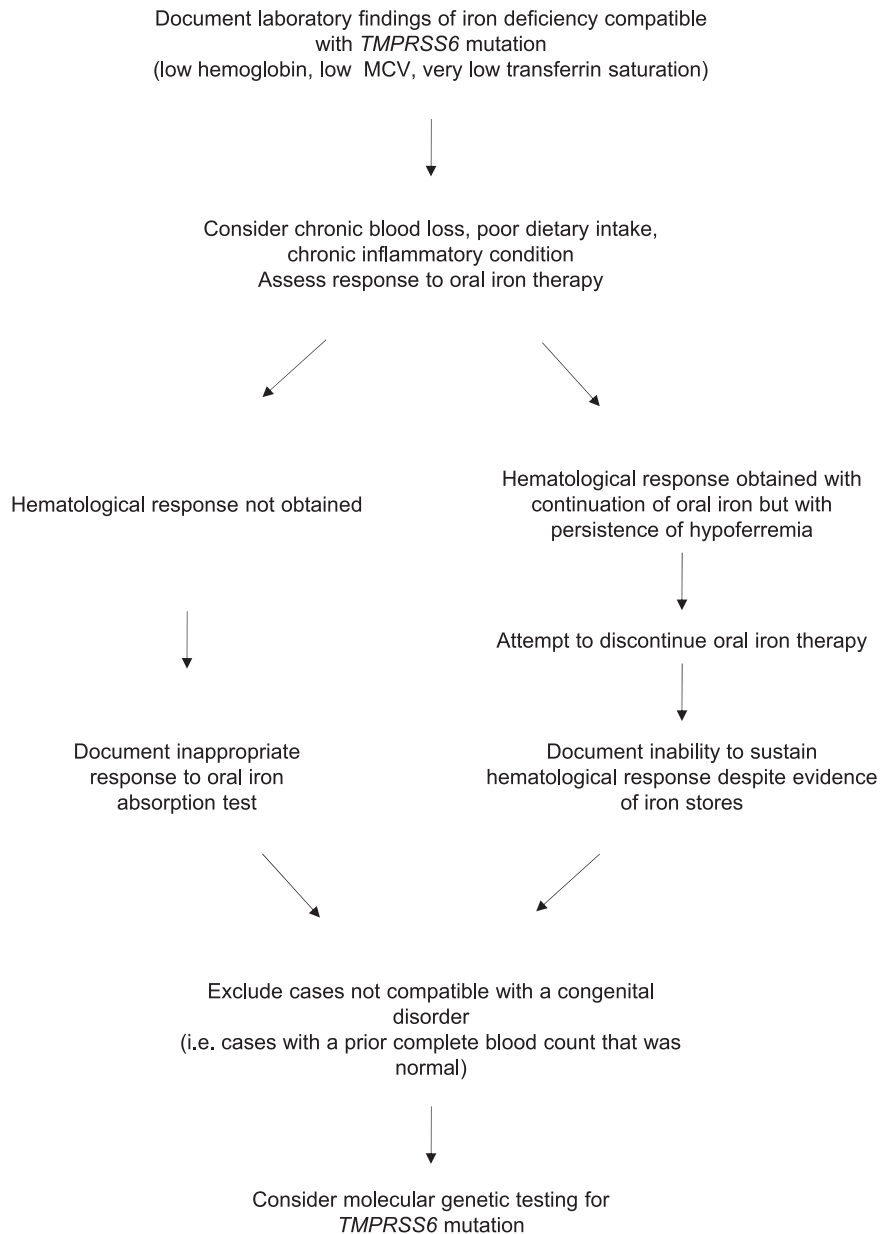

**SUPPLEMENTAL FIGURE 1**

Suggested diagnostic algorithm for the evaluation of IRIDA.
